# Supplementary material
Source: publisher figshare collection journal article supplement (https://gsapubs.figshare.com/ndownloader/files/22741499)
Supplement: Supplementary file 1 [file 22741499]

GSA Data Repository Item # 8101

Title of article Problems in determination of the water content of rock-salt samples and its significance in nuclear-waste storage siting

Author(s) Edwin Roedder et al.

see Geology v. 9, p. 525 - 530

Contents 6 pages

Table 2 and References

---

---

---

---

---

---

---

---

---

---

Table 2. Literature data on water content of samples from proposed nuclear waste storage sites in rock salt deposits.

| REFERENCE                                     | SALT SOURCE                                                | SAMPLE<br>Wt. | Form                 | EXTRACTION<br>METHOD                  | ANAL.<br>METHOD     | Wt. %<br>H <sub>2</sub> O | ANALYSIS NOTES                                                                                                                                                       | SAMPLE PREPARATION AND<br>OTHER NOTES                                                                                    |
|-----------------------------------------------|------------------------------------------------------------|---------------|----------------------|---------------------------------------|---------------------|---------------------------|----------------------------------------------------------------------------------------------------------------------------------------------------------------------|--------------------------------------------------------------------------------------------------------------------------|
| Kaufmann, 1960                                | Carey salt mine<br>Hutchinson, Kansas                      | 10-20 g       | <40 mesh             | Heating<br>1 h, 105°C.                | Weight loss         | 0.089                     | Average of 3                                                                                                                                                         | 1-2.5 kg ground to <40 mesh,<br>mixed, and quartered.                                                                    |
| Same                                          | Detroit mine, Inter-<br>national Salt Co.,<br>Michigan     | "             | "                    | "                                     | "                   | 0.165                     | Average of 4                                                                                                                                                         |                                                                                                                          |
| Same                                          | Avery Island mine,<br>International Salt<br>Co., Louisiana | "             | "                    | "                                     | "                   | 0.022                     | Average of 7                                                                                                                                                         |                                                                                                                          |
| Bradshaw and McClain,<br>1971, p. 5-6 and 171 | Hutchinson, Kansas                                         | 1-2 lb        | "Chunks"<br>(p. 170) | Heating to<br>400°C                   | Absorb and<br>weigh | 0.188                     | Average of 4, from<br>0.127-0.293%                                                                                                                                   | Heating time unspecified.                                                                                                |
| Same                                          | Lyons, Kansas                                              | "             | "                    | "                                     | "                   | 0.080                     | Average of 4, from<br>0.048-0.100%                                                                                                                                   | Clear crystal, atypical.                                                                                                 |
| Same                                          | Hutchinson, Kansas                                         | 153g          | "                    | "                                     | "                   | 1.08                      |                                                                                                                                                                      |                                                                                                                          |
| Same; p. 170                                  | Lyons, Kansas                                              | ?             | ?                    | Heating to<br>625°C                   | "                   | 0.50<br>1/                | Average of samples<br>> 2 ft from wall<br>of array hole,<br>both before and<br>after test                                                                            | From context, samples presumed<br>to be in the form of chunks or<br>sections of whole core. Heating<br>time unspecified. |
| Bradshaw and McClain,<br>1971, p. 170         | Retsof salt mine<br>International Salt Co.                 | ?             | ?                    | "                                     | "                   | "                         | Volume percent<br>"water" 0.06                                                                                                                                       |                                                                                                                          |
| Same                                          | Detroit salt mine<br>International Salt Co.,<br>Michigan   | ?             | ?                    | "                                     | "                   | "                         | Volume percent<br>"water" 0.90                                                                                                                                       |                                                                                                                          |
| Kopp and Fallis, 1973                         | Lyons, Kansas<br>Cores 1 & 2                               | 1.5-<br>2g    | 60-<br>120 mesh      | Heating to<br>102+5°C<br>2-4 1/2 days | Weight loss         | 0.0-<br>19.0              | Also in Powers, et<br>al., 1978, p. 7-<br>38, but referred<br>to there as<br>"Hutchinson" salt<br>cores 1 and 2.<br>The 19% value was<br>from a sample of<br>gypsum. | Approximately 3/4 lb was crushed<br><1/4" and quartered; only 60-<br>120 mesh fraction used.                             |
| Kopp and Combs, 1975                          | WIPP site,<br>New Mexico<br>Cores 7 & 8                    | 1.5-<br>2g    | 60-<br>120 mesh      | Heating to<br>102+5°C<br>2-4 1/2 days | Weight loss         | 0.1-<br>3.5               | Also in Powers, et<br>al., 1978, p. 7-37<br>and Appendix 7.G.                                                                                                        |                                                                                                                          |

Revised by  
Bassett 1.  
81-1

|                                                |                                                           |            |                 |                                                                                          |                                   |   |             |                                                                                                                                                                               |                                                                                                                                                                                                                            |
|------------------------------------------------|-----------------------------------------------------------|------------|-----------------|------------------------------------------------------------------------------------------|-----------------------------------|---|-------------|-------------------------------------------------------------------------------------------------------------------------------------------------------------------------------|----------------------------------------------------------------------------------------------------------------------------------------------------------------------------------------------------------------------------|
| Beane and Popp, 1975                           | WIPP site, New Mexico Cores 7 & 8                         | 1-2g       | 90% <100 mesh   | Heating, 70°C, 2 h.                                                                      | "                                 | " | 0.02-1.87   | Also in Powers et al., 1978, p. 7-7 and Appendix 7.A; samples range from essentially pure salt to 69% in-soluble. Only wt. loss <300° attributed largely to H <sub>2</sub> O. | Ambiguous: "Each sample was dried at least 3 days at 65°C" (p. 7-7). "Nuggets" crushed and ground <10 mins before weighing, but in laboratory air that was "relatively high" in humidity (p. 7-14).                        |
| Same                                           | Same                                                      | 0.1g       | "powder"        | TGA at 10°C/min                                                                          | "                                 | " | 0.10-6.84   |                                                                                                                                                                               |                                                                                                                                                                                                                            |
| Hohlfelder and Hadley, 1979; Hohlfelder, 1979b | Miss. Chem. Co. mine, near WIPP site, New Mexico          | ~ 1kg      | Cylinder (core) | Heating to 250°C over 3 days in inert gas stream                                         | Weight loss, and absorb and weigh |   | 0.10-0.15   | Wt. % values given are based on an assumed sample weight of 1 kg.                                                                                                             | Thoroughly air-dried (up to one year).                                                                                                                                                                                     |
| Hohlfelder, 1979b                              | Miss. Chem. Co. mine, near WIPP site, New Mexico          | 20g        | 1-2g pieces     | Heating 1-5 days at each of 13 temps.: 75-325°C                                          | Weight loss                       |   | 0.09        |                                                                                                                                                                               |                                                                                                                                                                                                                            |
| Jockwer, 1979, and personal communication      | Asse salt mine, Germany                                   | 3g         | < ~ 1mm         | TGA (separate samples to each temperature)                                               | Weight loss                       |   | ~ 0.15      | Liquid water evaporation contributes ~ 0.02%; then ground to <1 mm in sealed ball mill with iron balls and mineral dehydration bottled.                                       | 1-5 kg core "crushed quickly" to ~2 cm in air at ~30% humidity, balance from ball mill with iron balls and bottled.                                                                                                        |
| Jockwer, 1980, and personal communication      | Asse salt mine, Germany                                   | 1-50g      | < ~ 1mm         | Heat to 400°C in flowing N <sub>2</sub> and dissolve H <sub>2</sub> O in 100 ml methanol | Karl Fischer titration            |   | ~ 0.15      |                                                                                                                                                                               |                                                                                                                                                                                                                            |
| Jockwer, 1980, and personal communication      | Asse salt mine, Germany                                   | ~ 1kg      | < ~ 1mm         | Heat to 400°C in flowing N <sub>2</sub>                                                  | Condense at -78°C and weigh       |   | ~ 0.15      | Got some HCl also.                                                                                                                                                            |                                                                                                                                                                                                                            |
| Hite, et al., 1979                             | Non-diapiric salt anticline, Northern Paradox Basin, Utah | 1kg        | Core            | Solution in hot methanol                                                                 | Karl Fischer titration            |   | 0.21        |                                                                                                                                                                               |                                                                                                                                                                                                                            |
| Hite and Ging, 1981 <sup>2/</sup>              | Diapiric salt anticline in Salt Valley, Utah              | 1000-1800g | "               | "                                                                                        | "                                 |   | 0.008-0.117 | Range for 22                                                                                                                                                                  | Preliminary determination; appears to be anomalously high, based on subsequent work (R.J. Hite, personal communication, 1981). Very pure (<2% insoluble, mainly anhydrite). Personal comm., R.J. Hite and T.G. Ging, 1981. |

*Roedder + Bassett 3.*

| Bassett and Roedder;<br>1981 |                                     | Palo Duro basin, TX                 | 1-2g    | 40-60 mesh    | Solution in<br>methanol                     | Karl Fischer<br>titration                                                          | 0.15-<br>2.25    | Range for 7  | Analyses by Oak Ridge National<br>Laboratory, samples had 0.51 to<br>32.66% insolubles.                                                                                                                              |
|------------------------------|-------------------------------------|-------------------------------------|---------|---------------|---------------------------------------------|------------------------------------------------------------------------------------|------------------|--------------|----------------------------------------------------------------------------------------------------------------------------------------------------------------------------------------------------------------------|
| Same                         | Same                                | Same                                | "       | "             | Heat at 150°<br>1 hr in air                 | Weight loss                                                                        | 0.08-<br>2.30    | Range for 8  |                                                                                                                                                                                                                      |
| Same                         | Same                                | Same                                | "       | "             | Heat at 650°<br>1 hr in air                 | "                                                                                  | 0.17-<br>6.29    | Range for 8  |                                                                                                                                                                                                                      |
| Same                         | Same                                | Same                                | ~ 1200g | Core          | Whole core<br>refluxed with<br>hot methanol | Karl Fischer<br>titration                                                          | 0.27-<br>1.82    | Range for 6  |                                                                                                                                                                                                                      |
| Gustavson, et al., 1980      |                                     | Palo Duro and<br>Dalhart basins, TX | 1-2g    | 40-60<br>mesh | Solution in<br>methanol                     | Karl Fischer<br>titration                                                          | 0.15-<br>2.44    | Range for 7  | Analyses by R.J. Hite, USGS.<br><br>Free water only; does not include<br>water from clay minerals and oxy-<br>hydroxide phases. Note particularly:<br>the values given are normalized to<br>an insoluble-free basis. |
| Knauth and Kumar,<br>1981    |                                     | Weeks Island dome,<br>Louisiana     | 3-56g   | Pieces        | Heating to<br>1000°C in<br>vacuo            | Reduce H <sub>2</sub> O to<br>H <sub>2</sub> and<br>measure<br>manomet-<br>rically | 0.01 -<br>0.09   | Range for 10 |                                                                                                                                                                                                                      |
| Same                         | Belle Island dome,<br>Louisiana     | "                                   | "       | "             | "                                           | "                                                                                  | 0.003-<br>0.52   | Range for 6  |                                                                                                                                                                                                                      |
| Same                         | Jefferson Island<br>dome, Louisiana | "                                   | "       | "             | "                                           | "                                                                                  | 0.001-<br>0.004  | Range for 4  |                                                                                                                                                                                                                      |
| Same                         | Avery Island dome,<br>Louisiana     | "                                   | "       | "             | "                                           | "                                                                                  | 0.003-<br>0.004  | Range for 3  | Mine samples. These data super-<br>cede preliminary data by<br>L.P. Knauth, published in Martinez,<br>et al., 1980 (personal communica-<br>tion, L.P. Knauth, 1981).                                                 |
| Same                         | Vacherie dome,<br>Louisiana         | "                                   | "       | "             | "                                           | "                                                                                  | 0.001-<br>0.004  | Range for 5  |                                                                                                                                                                                                                      |
| Same                         | Rayburn's dome,<br>Louisiana        | "                                   | "       | "             | "                                           | "                                                                                  | 0.0005-<br>0.006 | Range for 5  |                                                                                                                                                                                                                      |
|                              |                                     |                                     |         |               |                                             |                                                                                    |                  |              |                                                                                                                                                                                                                      |

1/Presumed, from context, to be weight % but may be volume %.

2/Personal communication - see notes.

## References (to Table 2)

- Bassett, R.L. and Roedder, E., 1981, Water content in Palo Duro salt, Randall and Swisher County cores, in Gustavson, T.C., and others, Geology and geohydrology of the Palo Duro Basin, Texas Panhandle: The Univ. of Texas at Austin, Bureau of Econ. Geology, Geological Circular xy (in press).
- Beane, R.E. and Popp, C.J., 1975, Chemical, mineralogical and thermogravimetric analyses of selected core samples from Carlshad, New Mexico: Research report, Contract 3673-3, Suppl. 3, Union Carbide Corp., 11 pp. plus figures and appendices.
- Bradshaw, R.L. and McClain, W.C., eds., 1971, Project Salt Vault: Oak Ridge National Laboratory ORNL-4555 356 pp.
- Gustavson, T.C., Bassett, R.L., Baumgardner, W., Bentley, M.E., Dutton, S.P., Goldstein, A., McGowen, J.H., and Presley, M.W., 1980, Nuclear waste isolation studies of the Palo Duro and Dalhart basins, Texas Panhandle, FY1980 (abst): Proceedings 1980 National Waste Terminal Storage Program Information Meeting, Dec. 9-11, 1980, Columbus, OH: ONWI-212, p. 269-273.
- Hite, R.J., Rush, F.E., Balch, A.H., Daniels, J.J., Friedman, J.D., Watts, R., and Ackerman, H.D., 1979, Geologic exploration at Salt Valley, Utah (abst.): Proceedings of the National Waste Terminal Storage Program Information Meeting, Oct. 30-Nov. 1, 1979, Columbus, Ohio: ONWI 62, p. 73-75.
- Hohlfelder, J.J., 1979b, Measurement of water lost from heated geologic salt: Sandia National Laboratories, Sand 79-0462, 22 pp.

- Hohlfelder, J.J. and Hadley, G.R., 1979, Laboratory studies of water transport in rock salt: Sandia National Laboratories, Sand 79-1519, 13 pp.
- Jockwer, N., 1979, Investigation on the migration and release of water within rock-salt, in Waste Isolation Performance Assessment and In-Situ Testing, Proc. U.S./Federal Republic of Germany Bilateral Workshop, Berlin, Oct. 1-5, 1979, p. 392-396.
- Jockwer, N., 1980, Laboratory investigations on the water content within the rock-salt and its behavior in a temperature field of disposed high level waste (abst.): Material Research Soc. Annual Meeting Program, Symposium D, p. D52.
- Kaufmann, D.W., 1960, Sodium Chloride: New York, Reinhold Pub. Company, 743 pp.
- Knauth, L.P. and Kumar, M.B., 1981, Trace water content of salt in Louisiana salt domes: Science (in press).
- Kopp, O.C. and Combs, D.W., 1975, Mineral sources of water in evaporite sequences (Salado salt and adjacent beds at the proposed waste disposal facility near Carlsbad in Lea and Eddy Counties, New Mexico): Final report, ORNL/SUB-3670-3-4, Oak Ridge National Laboratory, 34 pp.
- Kopp, O.C. and Fallis, S.M., 1973, Mineral sources of water in evaporite sequences: Final Report, Subcontract 3670, Oak Ridge National Laboratory, 40 pp.
- Martinez, J.D., Thomas, R.L., Kolb, C.R., Kumar, M.B., Wilcox, R.E., and Newchurch, E.J., 1980, An investigation of the utility of Gulf Coast salt domes for the storage or disposal of radioactive wastes: Quarterly Report to Office of Nuclear Waste Isolation, July 1-Sept. 1, 1980, E511-02500-Q-4, p. 20-27.

Powers, D.W., Lambert, S.J., Shaffer, S.-E., Hill, L.R. and Weart, W.D.,  
eds., 1978, Geological characterization report, Waste Isolation Pilot  
Plant (WIPP) site, southeastern New Mexico: Sandia Laboratories,  
SAND 78-1596.
